# Supplementary material for: Photo-catalytic behavior of vanadia incorporated titania nanoparticles
Source: Royal Society of Chemistry journal article supplement (doi:10.1039/c3cy00053b), 2013-01-01
Supplement: c3cy00053b.pdf [file c3cy00053b.pdf]

**Figure 9(b):**

| Coordinates (Angstroms) |           |           |           |
|-------------------------|-----------|-----------|-----------|
| Atom                    | X         | Y         | Z         |
| O                       | -1.692036 | -1.142932 | -1.286570 |
| O                       | 1.988003  | -0.994863 | -0.696408 |
| O                       | -1.875328 | 2.576654  | -1.076856 |
| O                       | 1.804711  | 2.724723  | -0.486694 |
| Ti                      | -1.673263 | -3.032356 | -0.929579 |
| Ti                      | -1.856555 | 0.687230  | -0.719865 |
| Ti                      | 2.006775  | -2.884287 | -0.339417 |
| Ti                      | 1.823483  | 0.835300  | -0.129703 |
| Ti                      | -2.039848 | 4.406817  | -0.510150 |
| Ti                      | 1.640191  | 4.554886  | 0.080012  |
| O                       | -1.508743 | -4.862519 | -1.496285 |
| O                       | 2.171295  | -4.714450 | -0.906122 |
| O                       | -3.586156 | -3.136022 | -0.762812 |
| O                       | 0.093882  | -2.987952 | -0.172650 |
| O                       | -3.769448 | 0.583565  | -0.553098 |
| O                       | -0.089410 | 0.731634  | 0.037064  |
| O                       | -5.372074 | -1.291002 | -1.876732 |
| O                       | 3.773921  | -2.839883 | 0.417512  |
| O                       | 3.590629  | 0.879704  | 0.627227  |
| O                       | 5.668042  | -0.846794 | -0.106246 |
| O                       | -2.058620 | 6.296241  | -0.867141 |
| O                       | 1.621419  | 6.444310  | -0.276979 |
| O                       | -3.952741 | 4.303152  | -0.343383 |
| O                       | -0.272702 | 4.451221  | 0.246779  |
| O                       | -5.555366 | 2.428585  | -1.667018 |
| O                       | 3.407337  | 4.599290  | 0.836941  |
| O                       | 5.484749  | 2.872793  | 0.103469  |
| Ti                      | -1.489971 | -6.751943 | -1.139294 |
| Ti                      | 2.190068  | -6.603873 | -0.549131 |
| Ti                      | -5.353302 | -3.180426 | -1.519741 |
| Ti                      | -5.536594 | 0.539161  | -1.310027 |
| Ti                      | 5.686814  | -2.736217 | 0.250745  |
| Ti                      | 5.503522  | 0.983369  | 0.460459  |
| Ti                      | -2.223140 | 8.126403  | -0.300436 |
| Ti                      | 1.456899  | 8.274473  | 0.289726  |
| Ti                      | -5.719886 | 4.258747  | -1.100313 |
| Ti                      | 5.320230  | 4.702956  | 0.670174  |
| O                       | -1.325451 | -8.582105 | -1.705999 |
| O                       | 2.354588  | -8.434036 | -1.115837 |
| O                       | -3.402864 | -6.855608 | -0.972526 |
| O                       | 0.277175  | -6.707539 | -0.382364 |

|    |           |           |           |
|----|-----------|-----------|-----------|
| O  | -5.188782 | -5.010588 | -2.086447 |
| O  | 3.957213  | -6.559469 | 0.207798  |
| O  | 5.851334  | -4.566380 | -0.315960 |
| O  | -7.266195 | -3.284091 | -1.352974 |
| O  | -7.449487 | 0.435496  | -1.143260 |
| O  | -9.052113 | -1.439071 | -2.466895 |
| O  | 7.453960  | -2.691813 | 1.007674  |
| O  | 7.270667  | 1.027773  | 1.217389  |
| O  | 9.348080  | -0.698724 | 0.483916  |
| O  | -2.241912 | 10.015827 | -0.657427 |
| O  | 1.438126  | 10.163896 | -0.067265 |
| O  | -4.136033 | 8.022738  | -0.133669 |
| O  | -0.455994 | 8.170807  | 0.456493  |
| O  | -5.738659 | 6.148171  | -1.457304 |
| O  | 3.224044  | 8.318877  | 1.046655  |
| O  | 5.301457  | 6.592379  | 0.313183  |
| O  | -7.632779 | 4.155082  | -0.933546 |
| O  | -9.235405 | 2.280515  | -2.257180 |
| O  | 7.087375  | 4.747360  | 1.427103  |
| O  | 9.164788  | 3.020862  | 0.693631  |
| Ti | -5.170009 | -6.900012 | -1.729456 |
| Ti | 5.870106  | -6.455804 | 0.041031  |
| Ti | -9.033340 | -3.328495 | -2.109904 |
| Ti | -9.216633 | 0.391091  | -1.900189 |
| Ti | 9.366853  | -2.588148 | 0.840907  |
| Ti | 9.183560  | 1.131438  | 1.050622  |
| Ti | -5.903178 | 7.978334  | -0.890598 |
| Ti | 5.136937  | 8.422542  | 0.879888  |
| Ti | -9.399925 | 4.110678  | -1.690475 |
| Ti | 9.000268  | 4.851025  | 1.260336  |
| O  | -5.005490 | -8.730175 | -2.296161 |
| O  | 6.034626  | -8.285967 | -0.525675 |
| O  | -7.082902 | -7.003677 | -1.562689 |
| O  | -8.868821 | -5.158658 | -2.676609 |
| O  | 7.637252  | -6.411400 | 0.797960  |
| O  | 9.531372  | -4.418311 | 0.274202  |
| O  | -5.921951 | 9.867758  | -1.247589 |
| O  | 5.118165  | 10.311966 | 0.522897  |
| O  | -7.816071 | 7.874669  | -0.723831 |
| O  | -9.418697 | 6.000102  | -2.047466 |
| O  | 6.904083  | 8.466946  | 1.636817  |
| O  | 8.981496  | 6.740449  | 0.903345  |
| Ti | -8.850048 | -7.048082 | -2.319618 |
| Ti | 9.550145  | -6.307735 | 0.631193  |
| Ti | -9.583217 | 7.830264  | -1.480761 |
| Ti | 8.816976  | 8.570612  | 1.470050  |

|   |           |            |           |
|---|-----------|------------|-----------|
| O | -8.685528 | -8.878244  | -2.886323 |
| O | 9.714665  | -8.137897  | 0.064488  |
| O | -9.601989 | 9.719688   | -1.837751 |
| O | 8.798204  | 10.460035  | 1.113059  |
| O | -1.595794 | -6.382164  | 0.823374  |
| O | 1.649850  | -6.272487  | 1.347800  |
| V | 1.163653  | -5.974240  | 3.055038  |
| V | -1.933222 | -6.208676  | 2.582932  |
| O | -0.276693 | -6.167196  | 3.702838  |
| O | 2.461735  | -6.257950  | 3.909960  |
| O | -3.353362 | -6.249760  | 3.274247  |
| O | 1.308802  | 0.561533   | 1.783450  |
| O | 1.500897  | -3.156266  | 1.576337  |
| O | -1.835710 | -3.299012  | 1.045897  |
| O | -2.018999 | 0.420483   | 1.255599  |
| V | -0.074097 | 0.322393   | 3.151662  |
| V | 0.124333  | -3.394812  | 2.951026  |
| O | -0.028551 | -1.552708  | 3.602852  |
| O | 0.451276  | -4.940603  | 2.957386  |
| O | 3.159050  | -11.049581 | 6.715252  |
